# Supplementary material
Source: publisher figshare collection journal article supplement (https://frontiersin.figshare.com/ndownloader/files/13744205)
Supplement: Supplementary file 1 [file 13744205]

**Supplementary Table 2: Calculation of the correction factors.** The reconstructed lengths (mm) of the steady (S), unreleased (U) and released (R) state are calculated by a linear increase from the upper to the lower side. The relative position (Rel. Pos.) of the sector was multiplied with the difference of upper and lower length and added to the length of the upper side **(Difference x Rel. Pos. + Length upper side)**. A correction factor was calculated by the ratio of unfixed and fixed lengths (**Length untreated / Length FAA)**. FAA: Formalin-Acetic-Alcohol.

|  |  |  |  |  |  |  |  |  |  |  |
| --- | --- | --- | --- | --- | --- | --- | --- | --- | --- | --- |
|  | **Rel. Pos.** | **Reconstructed length** | | |  |  |  | **Correction factor** | | |
| **State** |  | S | S | U | U | R | R | S | U | R |
| **Treatment** |  | no | FAA | no | FAA | no | FAA |  |  |  |
| **Upper side** | 0 | 5.0 | 4.6 | 5.6 | 4.8 | 4.8 | 4.9 |  |  |  |
| **Lower side** | 1 | 7.8 | 6.7 | 6.3 | 5.5 | 10.7 | 8.8 |  |  |  |
| **Difference** |  | 2.8 | 2.1 | 0.7 | 0.7 | 5.9 | 3.9 |  |  |  |
| **Epidermis** | 0 | 5.0 | 4.6 | 5.6 | 4.8 | 4.8 | 4.9 | 1.09 | 1.17 | 0.98 |
| **Sub-epidermis** | 0 | 5.0 | 4.6 | 5.6 | 4.8 | 4.8 | 4.9 | 1.09 | 1.17 | 0.98 |
| **Sector 1** | 0.05 | 5.1 | 4.7 | 5.6 | 4.8 | 5.1 | 5.1 | 1.09 | 1.17 | 1.00 |
| **Sector 2** | 0.15 | 5.4 | 4.9 | 5.7 | 4.9 | 5.7 | 5.5 | 1.10 | 1.16 | 1.04 |
| **Sector 3** | 0.25 | 5.7 | 5.1 | 5.8 | 5.0 | 6.3 | 5.9 | 1.11 | 1.16 | 1.07 |
| **Sector 4** | 0.35 | 6.0 | 5.3 | 5.8 | 5.0 | 6.9 | 6.3 | 1.12 | 1.16 | 1.10 |
| **Sector 5** | 0.45 | 6.3 | 5.5 | 5.9 | 5.1 | 7.5 | 6.7 | 1.13 | 1.16 | 1.12 |
| **Sector 6** | 0.55 | 6.5 | 5.8 | 6.0 | 5.2 | 8.0 | 7.0 | 1.14 | 1.15 | 1.14 |
| **Sector 7** | 0.65 | 6.8 | 6.0 | 6.1 | 5.3 | 8.6 | 7.4 | 1.14 | 1.15 | 1.16 |
| **Sector 8** | 0.75 | 7.1 | 6.2 | 6.1 | 5.3 | 9.2 | 7.8 | 1.15 | 1.15 | 1.18 |
| **Sector 9** | 0.85 | 7.4 | 6.4 | 6.2 | 5.4 | 9.8 | 8.2 | 1.16 | 1.15 | 1.19 |
| **Sector 10** | 0.95 | 7.7 | 6.6 | 6.3 | 5.5 | 10.4 | 8.6 | 1.16 | 1.15 | 1.21 |
|  |  |  |  |  |  |  |  |  |  |  |
